# Supplementary material for: Evolutionary Trajectories of Beta-Lactamase CTX-M-1 Cluster Enzymes: Predicting Antibiotic Resistance
Source: PubMed Central journal article supplement (PMC2809773; doi:10.1371/journal.ppat.1000735), 2010-01-22
Supplement: ppat.1000735.s002.pdf [file ppat.1000735.s002.pdf]

**Suppl. Table S2.** Oligonucleotides used in this study.

| Oligonucleotides <sup>a</sup> | Sequence (5'-3')                                     | Size of amplification product (bp) | Reference  |
|-------------------------------|------------------------------------------------------|------------------------------------|------------|
| A77V-F                        | TGATGGCCGTGGCCGCGGTGCTGAA                            | 654                                | [23]       |
| A77V-R                        | TTCAGCACCGCGGCCACGGCCATCA                            | 300                                | [23]       |
| N114D-F                       | AAGCACGTTCGATGGGACGATG                               | 544                                | This study |
| N114D-R                       | TGACATCGTCCCATCGACGTG                                | 409                                | This study |
| A140S-F                       | ATGAATAAGCTGATTTCTCACG                               | 472                                | This study |
| A140S-R                       | AACGTGAGAAATCAGCTTATTC                               | 481                                | This study |
| P167S-F                       | CGTACCGAGTCGACGTAA                                   | 385                                | [23]       |
| P167S-R                       | TGTTTAACGTCGACTCGGTA                                 | 566                                | [23]       |
| D240G-F                       | AAACCGGCAGCGGTGGCTAT                                 | 174                                | [23]       |
| D240G-R                       | ATAGCCACCGCTGCCGTTT                                  | 776                                | [23]       |
| CTX-M-Eco                     | GGA <u>ATTCG</u> ACTATTCATGTTGTTGTTAATT <sup>b</sup> | -                                  | [23]       |
| CTX-M-Pst                     | AACTGCAGTTCCGCTATTACAAACCGT                          | -                                  | This study |
| D288N                         | AACTGCAGATTACAAACCGTTGGTGACGAT                       | 923                                | This study |

<sup>a</sup> These primers were designed based on *bla*<sub>CTX-M-1</sub> gene sequence (GenBank accession number X92506); <sup>b</sup> The *Eco*RI and *Pst*I restriction sites are underlined in primers CTX-M-Eco, CTX-M-Pst and D288N. PCR products were obtained using CTX-M-Eco and CTX-M-Pst or D288N with reverse and forward primers, respectively.
